# Supplementary material
Source: Springer Nature journal article supplement (https://www.springermedizin.de/resource/supplementary/12943_2009_660_MOESM3_ESM.pdf/9554506)

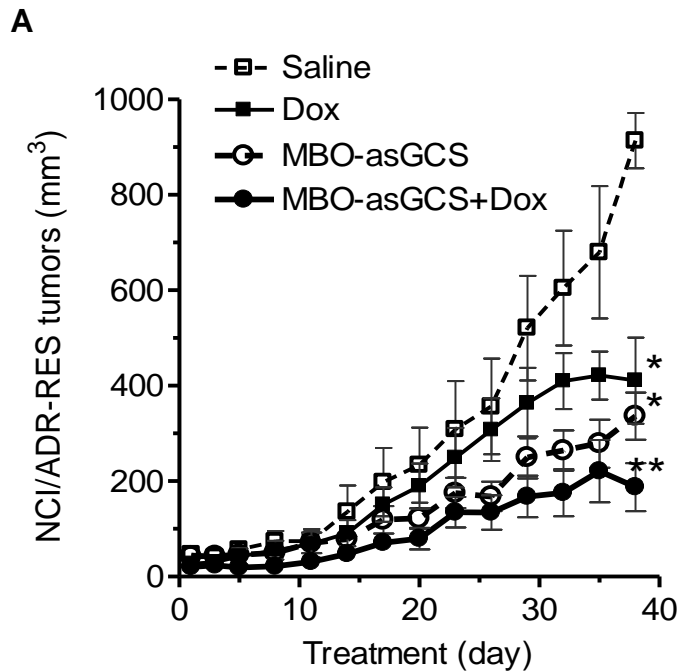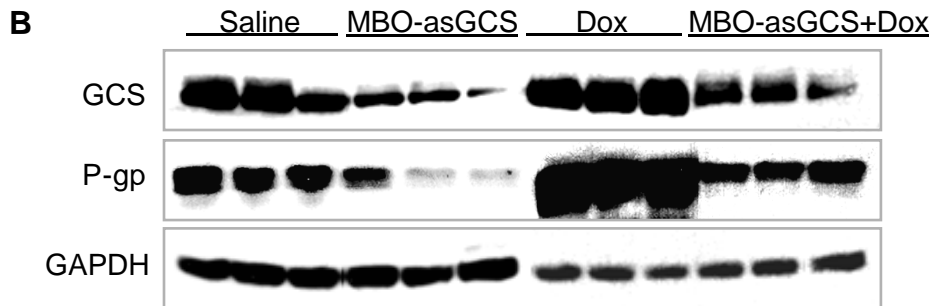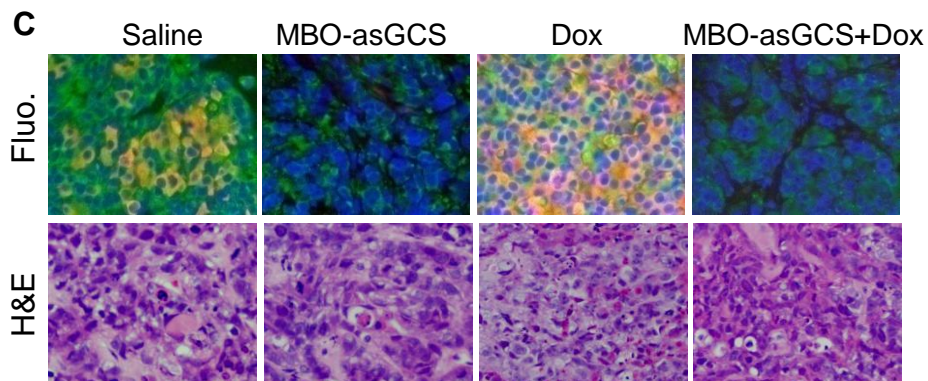

Supplement: MOESM3 [file 9554506]
